# Supplementary material
Source: publisher figshare collection journal article supplement (https://sage.figshare.com/ndownloader/files/16510874)
Supplement: Supplementary file 1 [file 16510874]

**
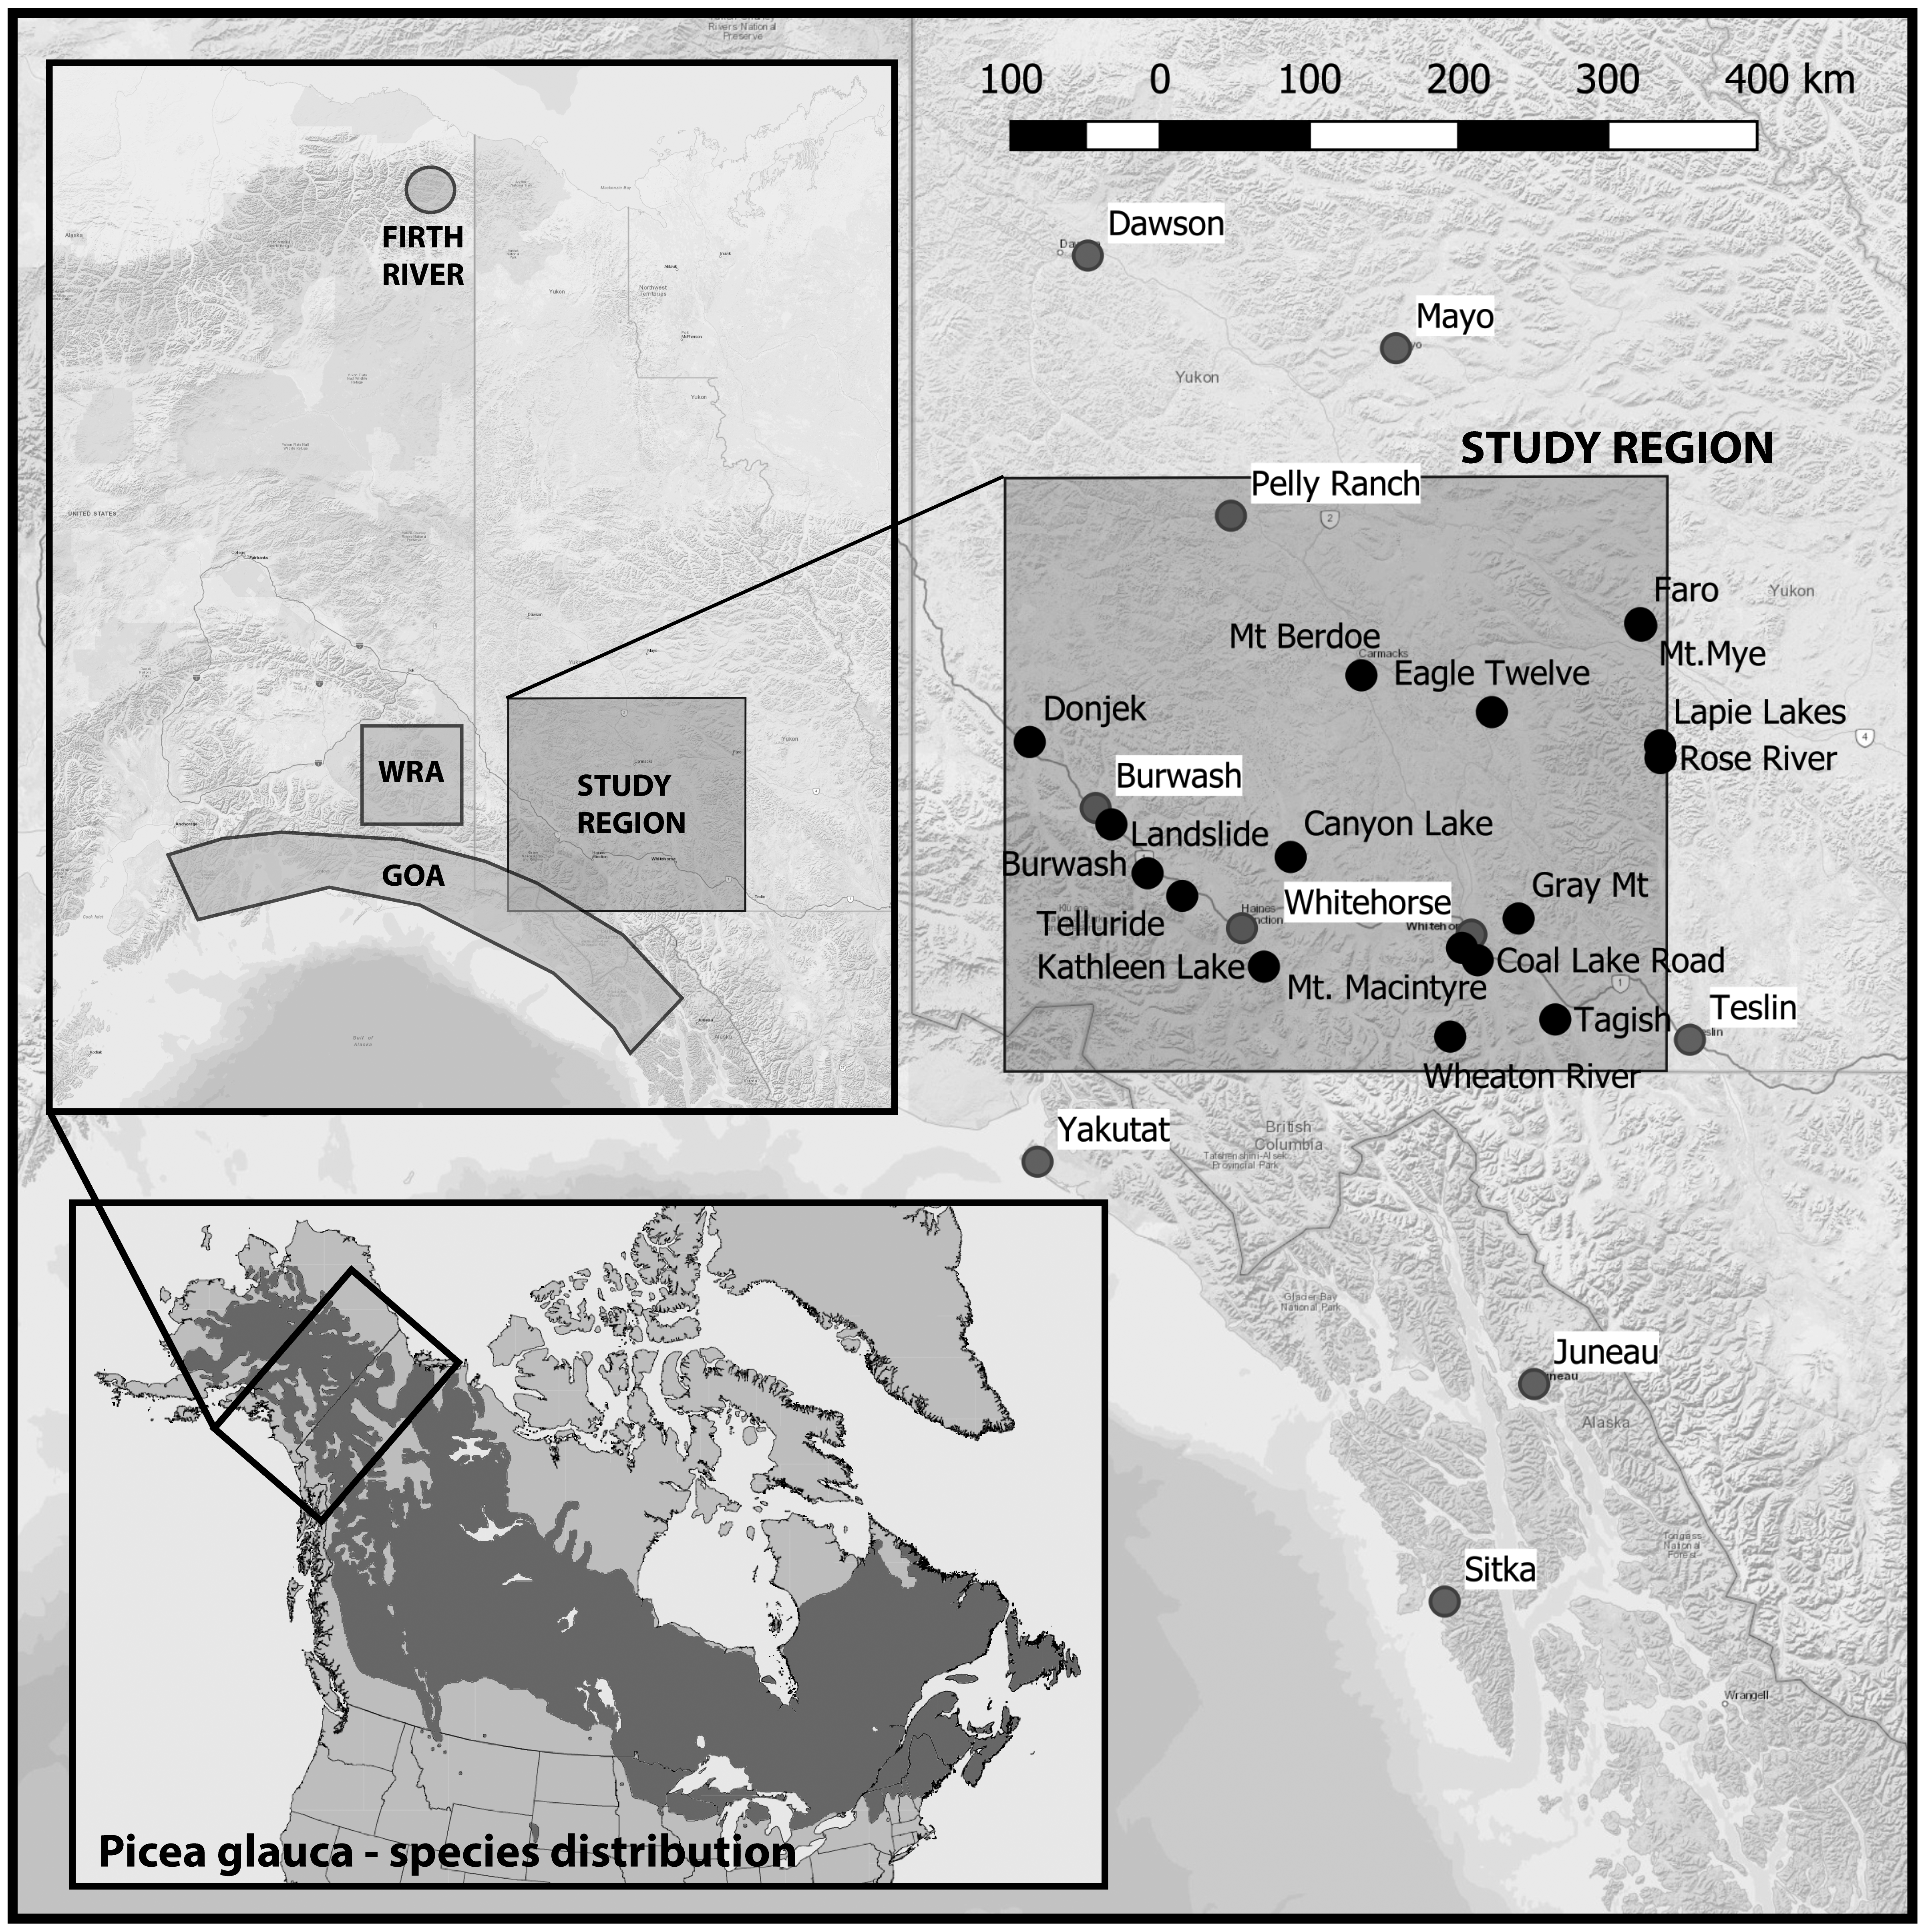
**

**Figure 1:** Location map showing the 17 tree-ring sites (black) and instrumental stations (blue). The “Study Region” box denotes the CRU TS 4.01 gridded (60-63N / 140-133W) temperature data (Harris et al. 2014) used for dendroclimatic analyses. Also shown is the spatial distribution of *Picea glauca* (white spruce) and the locations of the regional reconstructions compared in Figure 9.

**
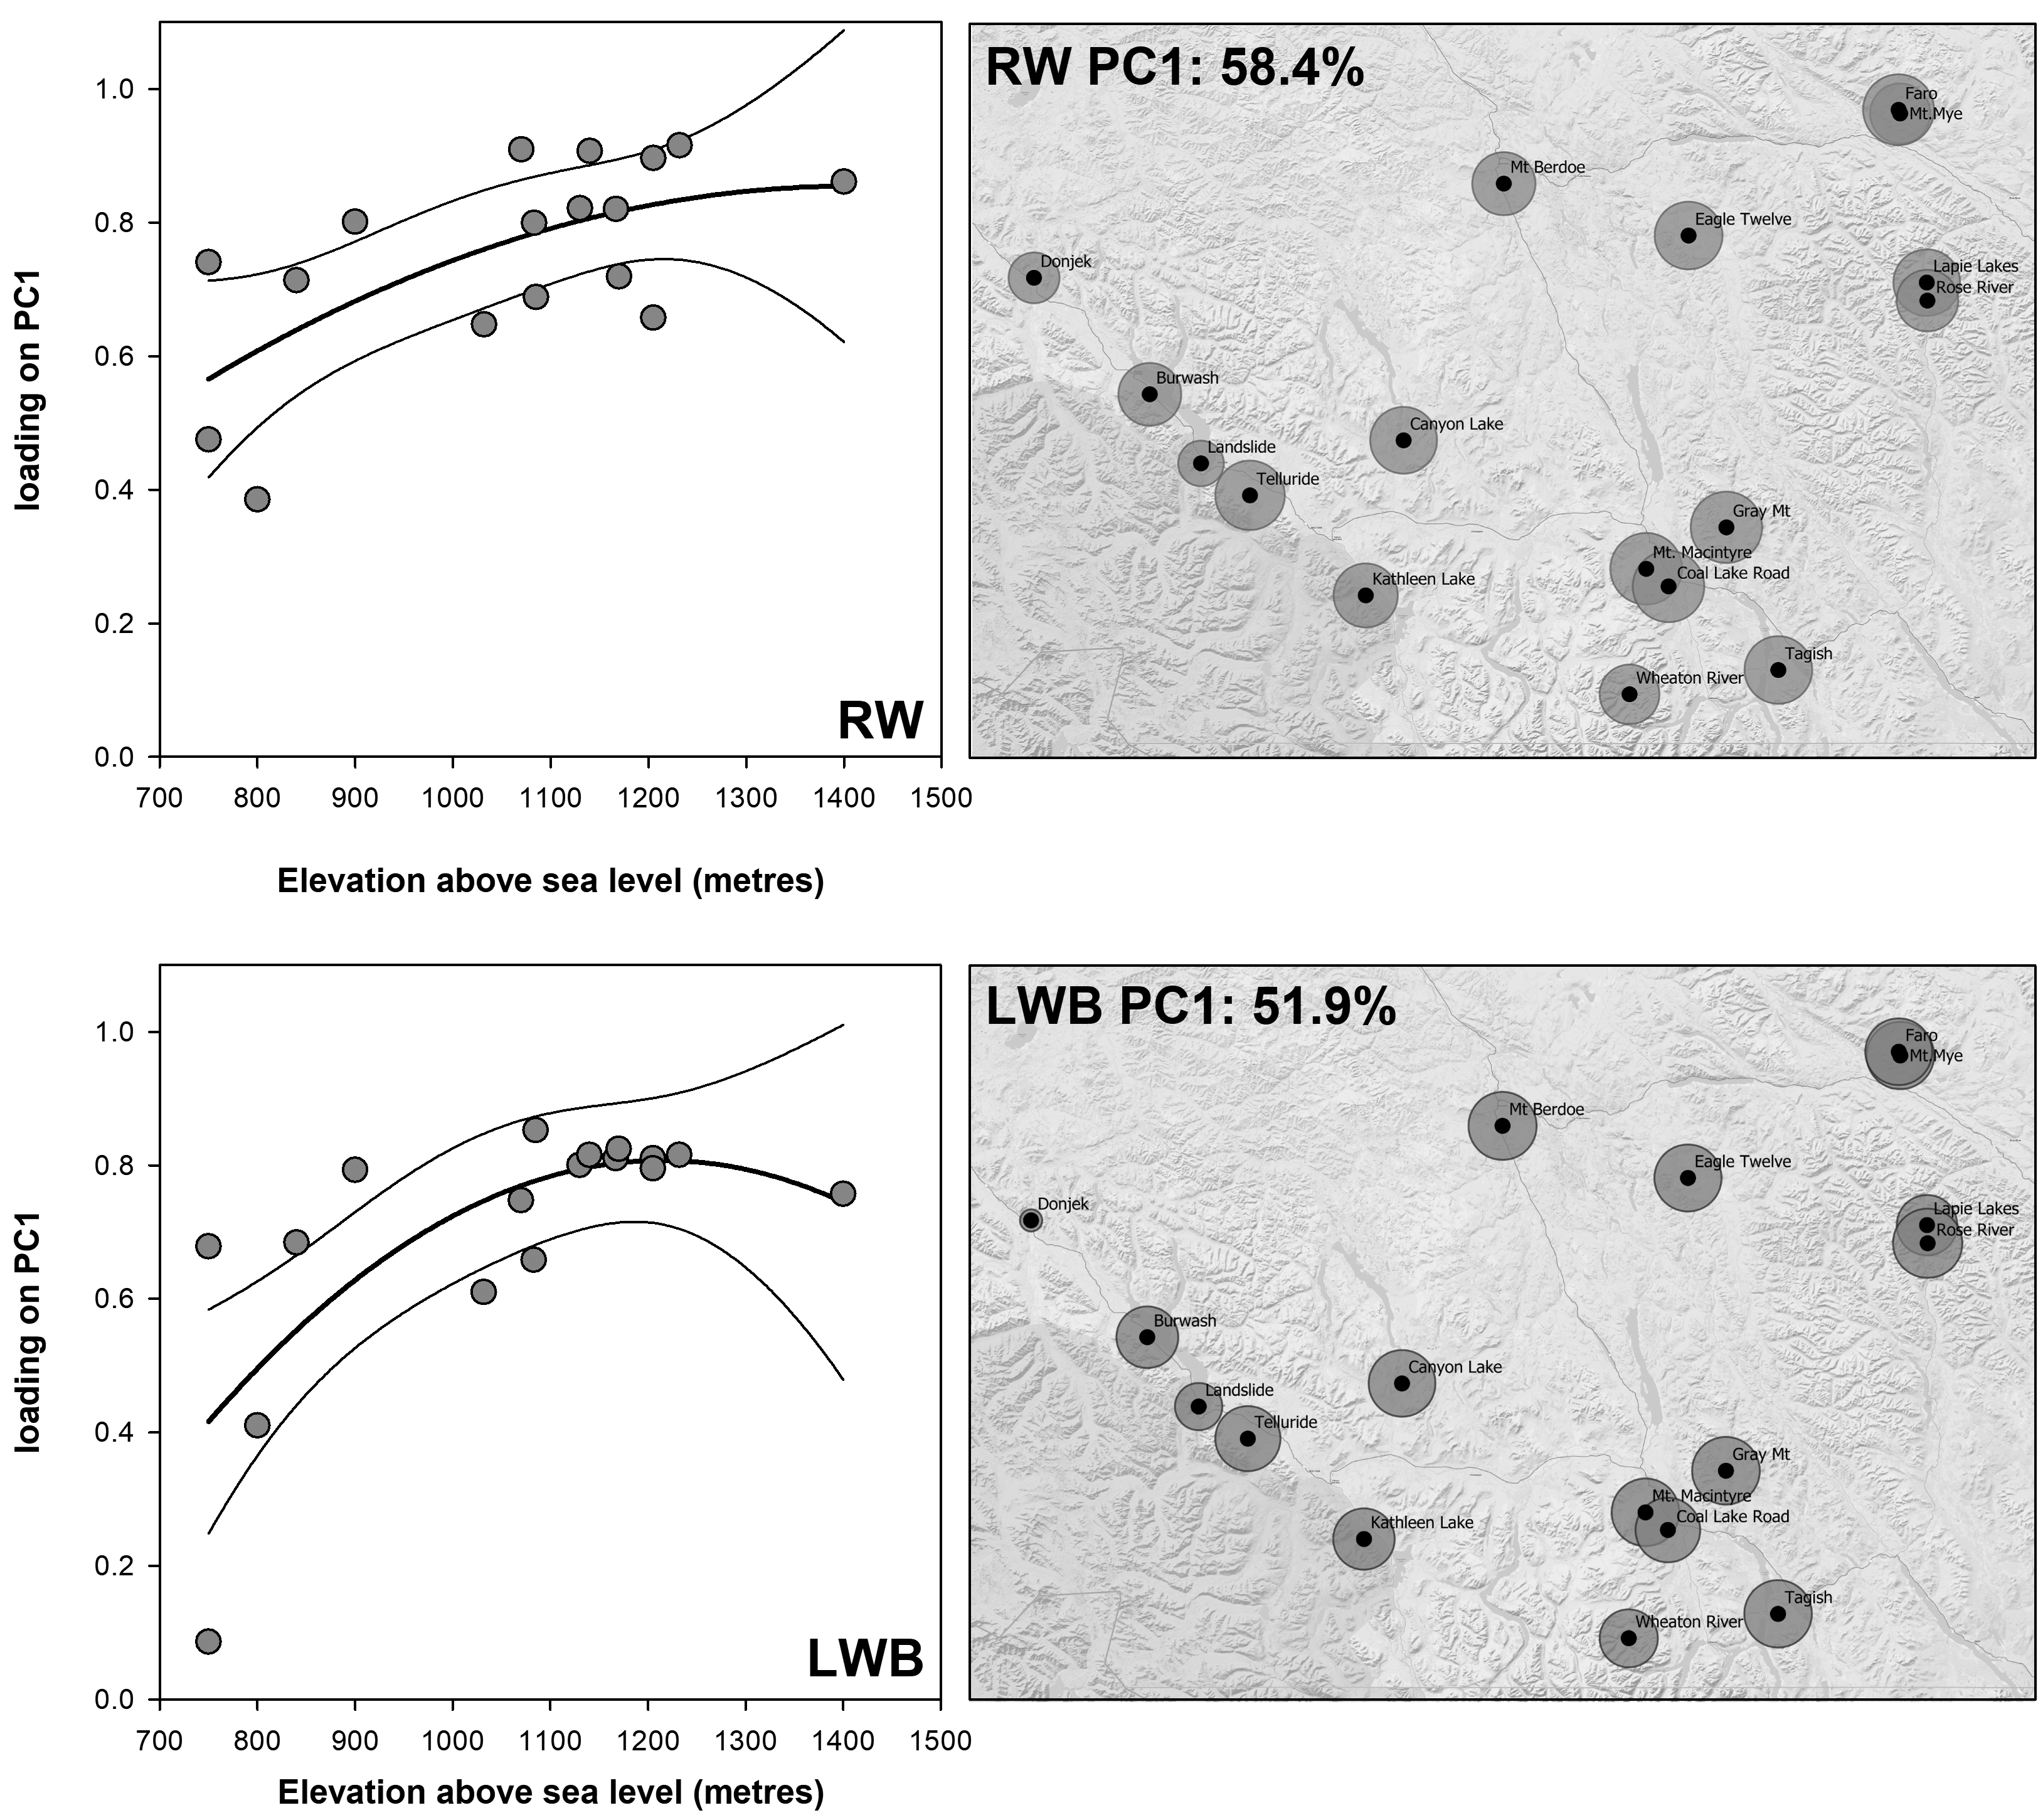
**

**Figure 2:** Principal component analysis (PCA) (1856-1997) loadings of each site chronology on the principal component using the ADSne-sf chronology versions. **Left:** Loadings plotted against site elevation. Non-linear relationship is shown using a 2nd-order polynomial function (with 2-sigma error); **right:** Loading values plotted spatially. Circle size is proportional to the loading value.Similar results are obtained using the different detrending options (Table 2 – not shown).

**
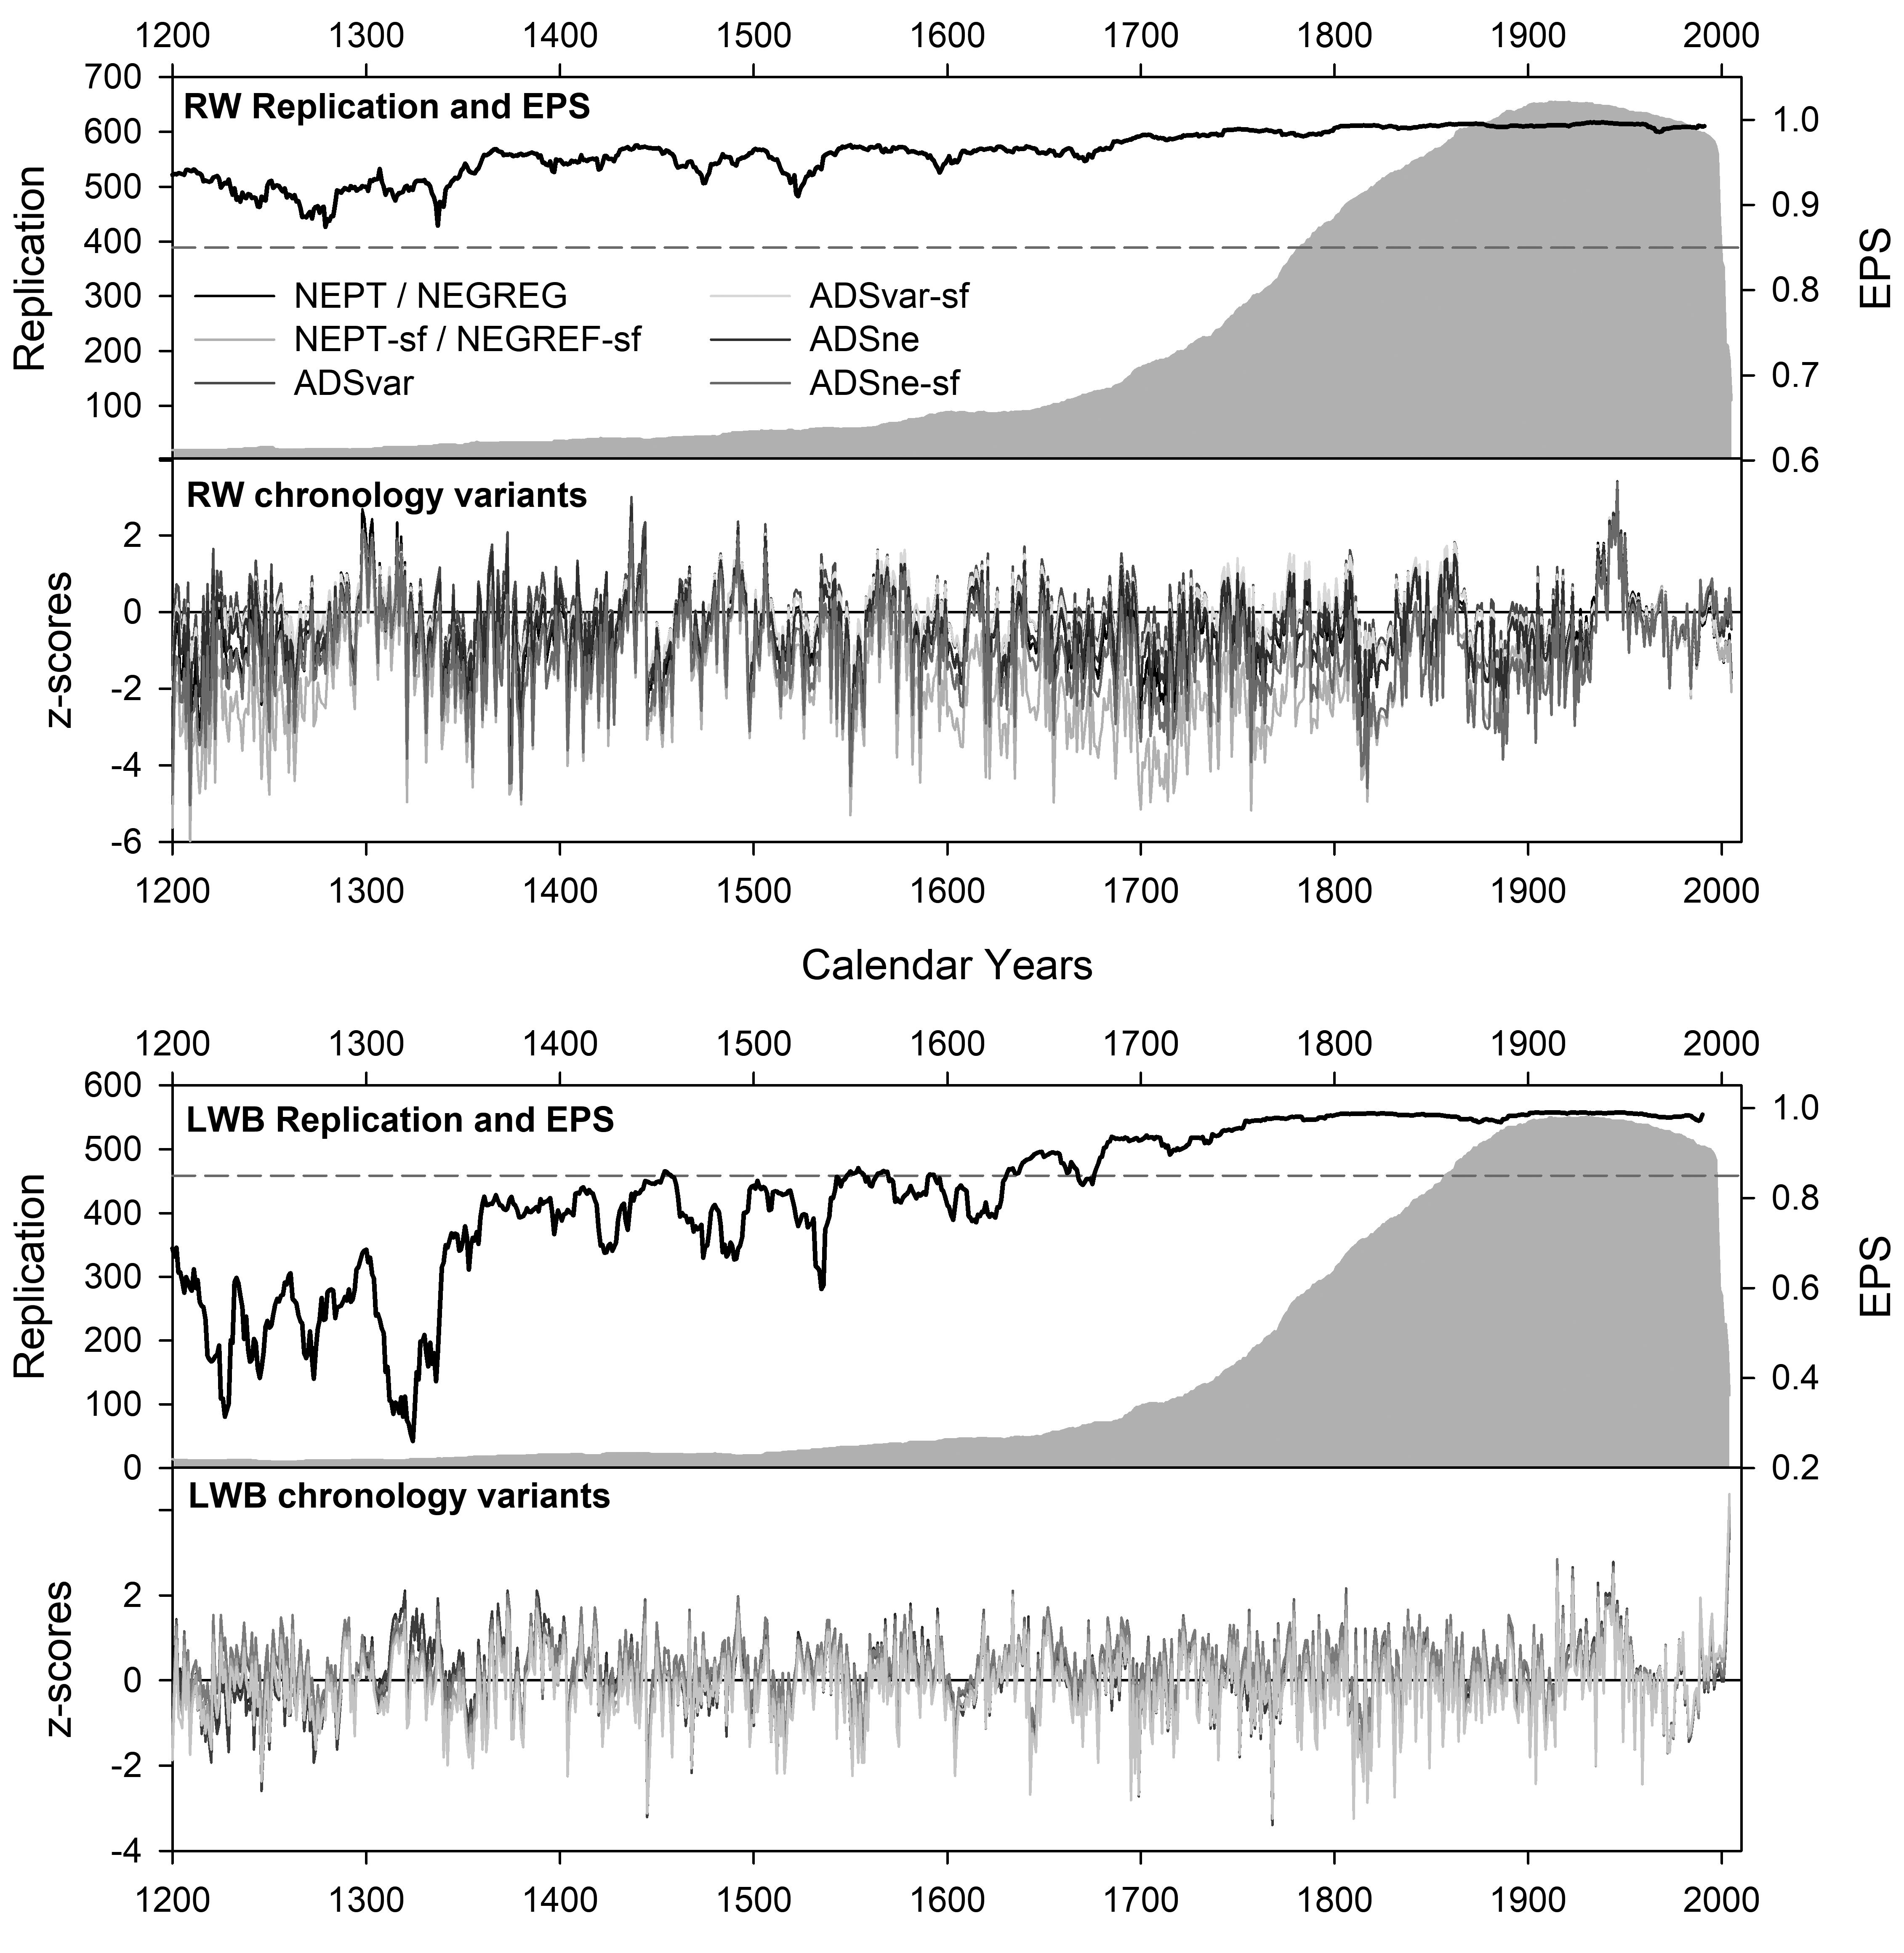
**

**Figure 3:** Regional composite chronologies: replication, Expressed Population Signal strength (ADSne-sf version) and chronology variants. To accentuate potential differences in the past, the chronologies are transformed to z-scores relative to the 1944-1997 period.


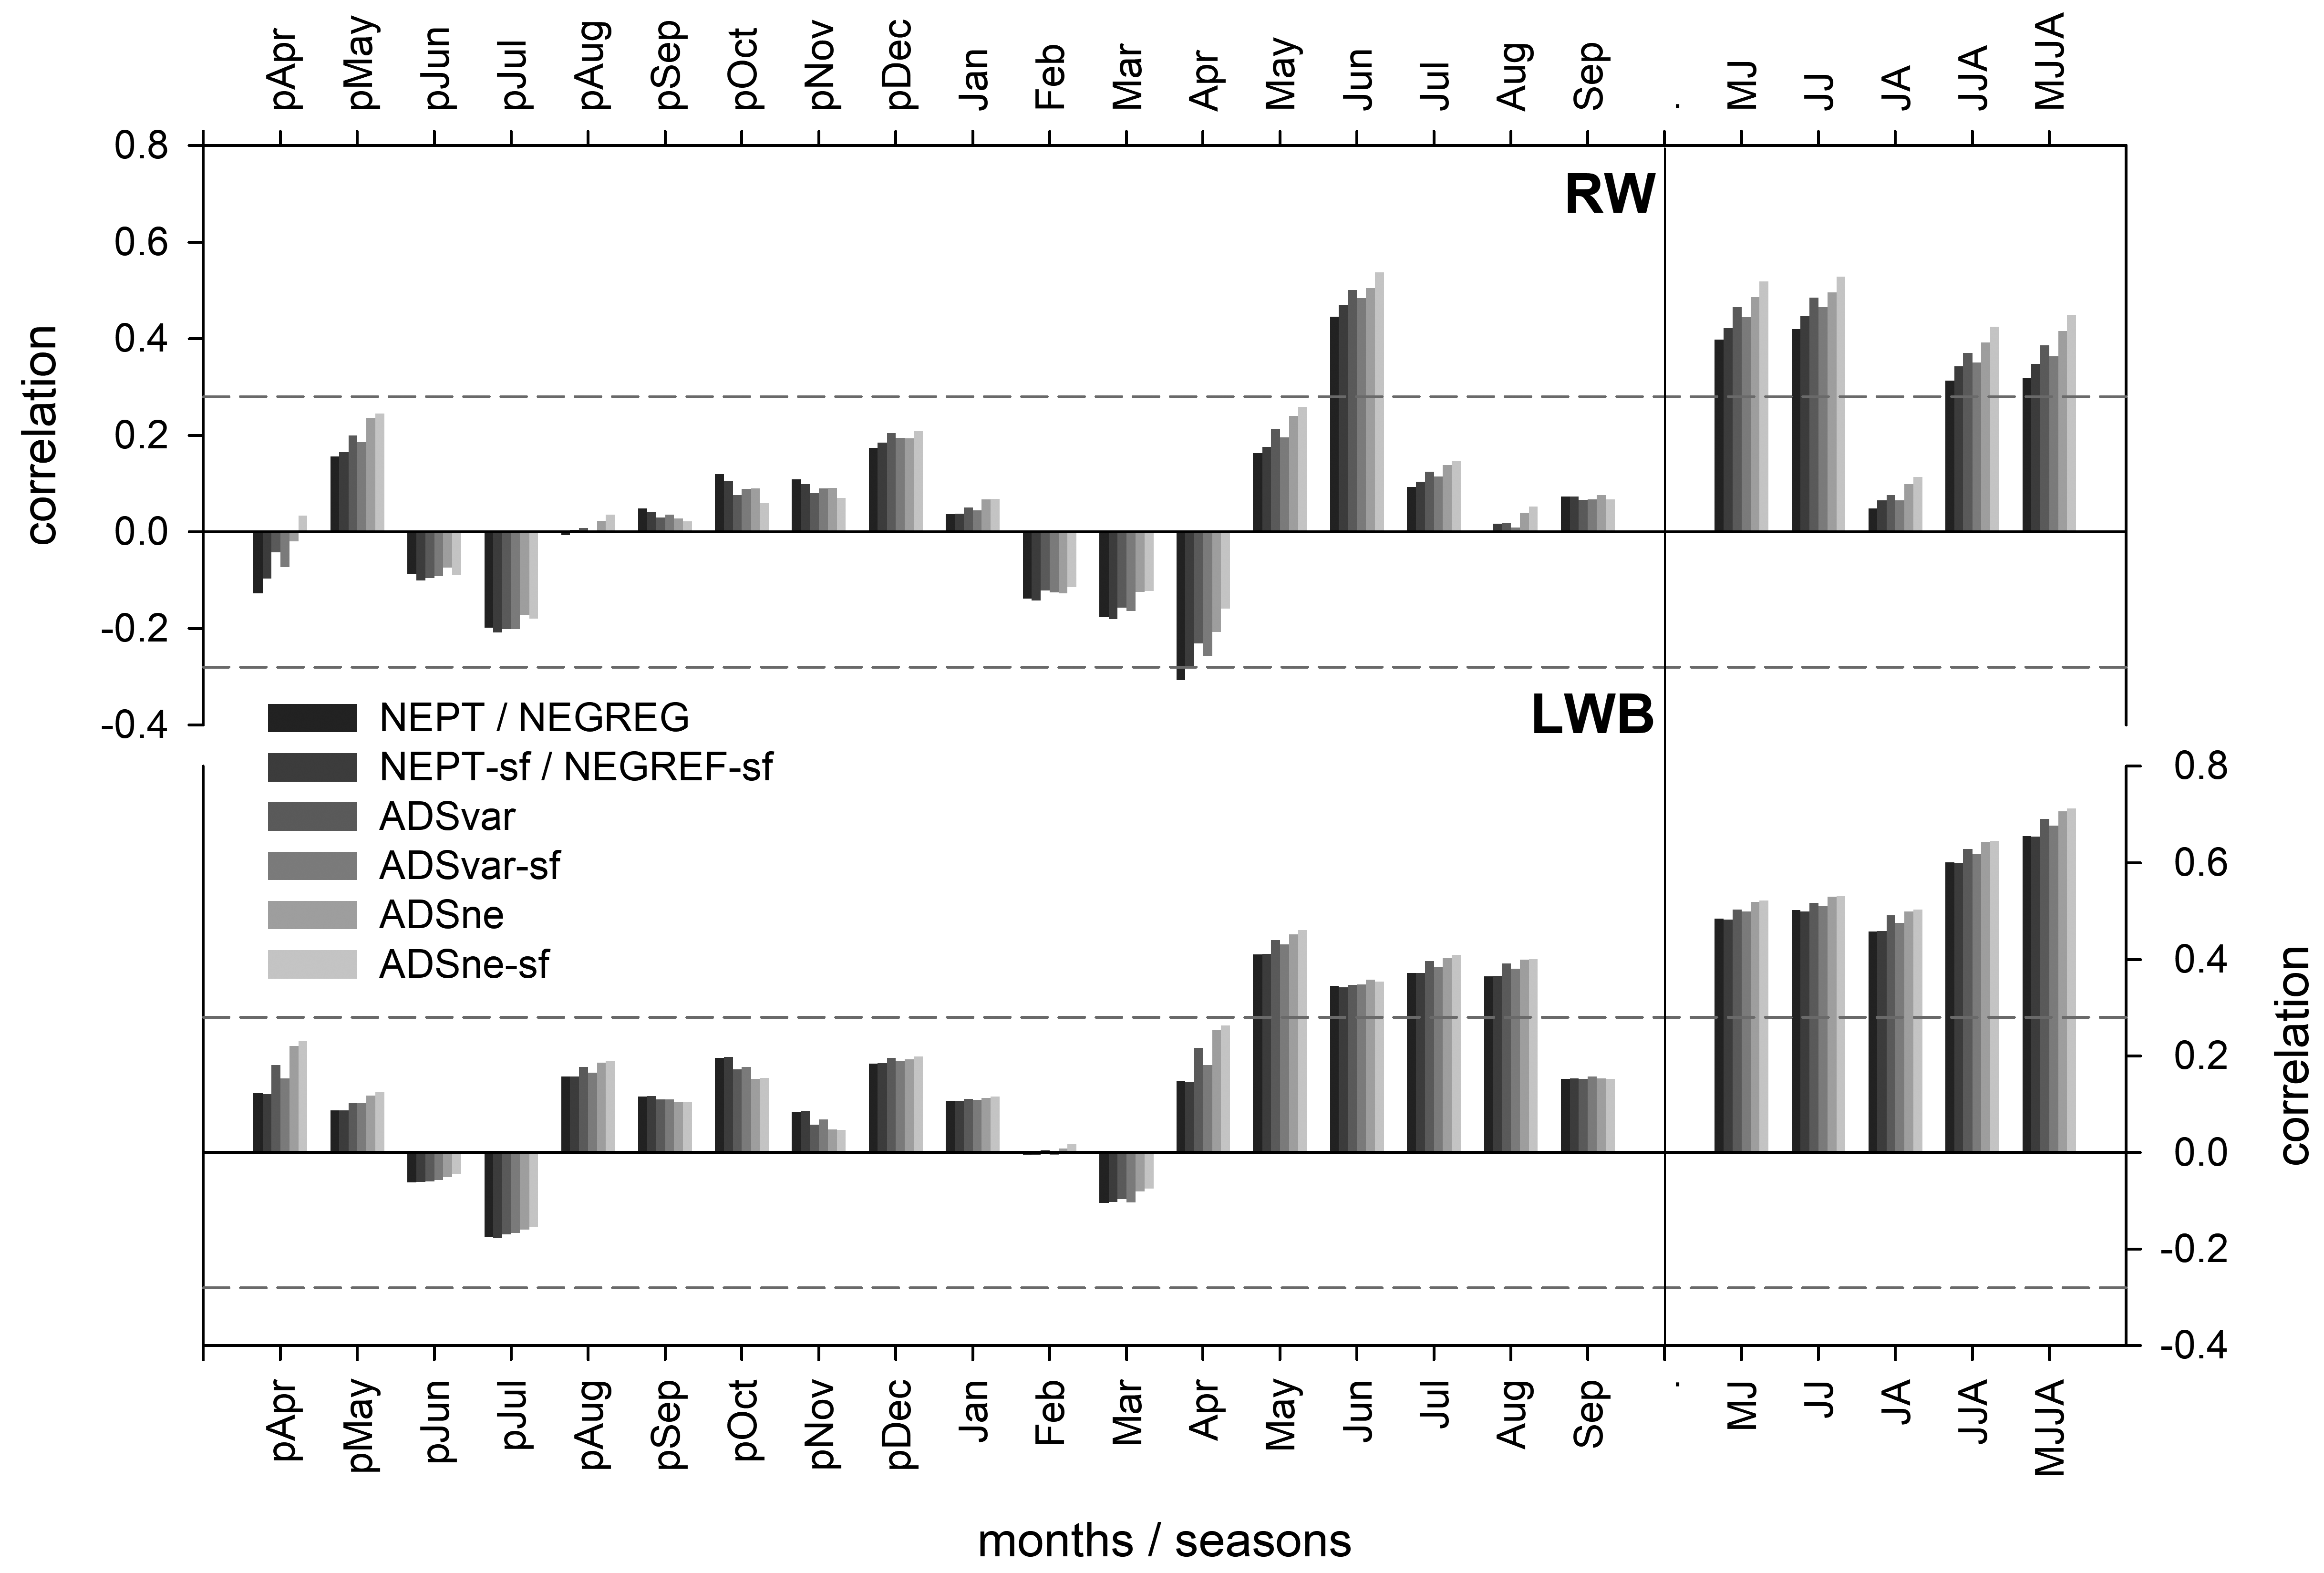


**Figure 4:** Correlation response function analysis (1944-1997) results for full regional composite chronologies against monthly and seasonal maximum temperatures. Dashed horizontal lines denote the 95% confidence limit.


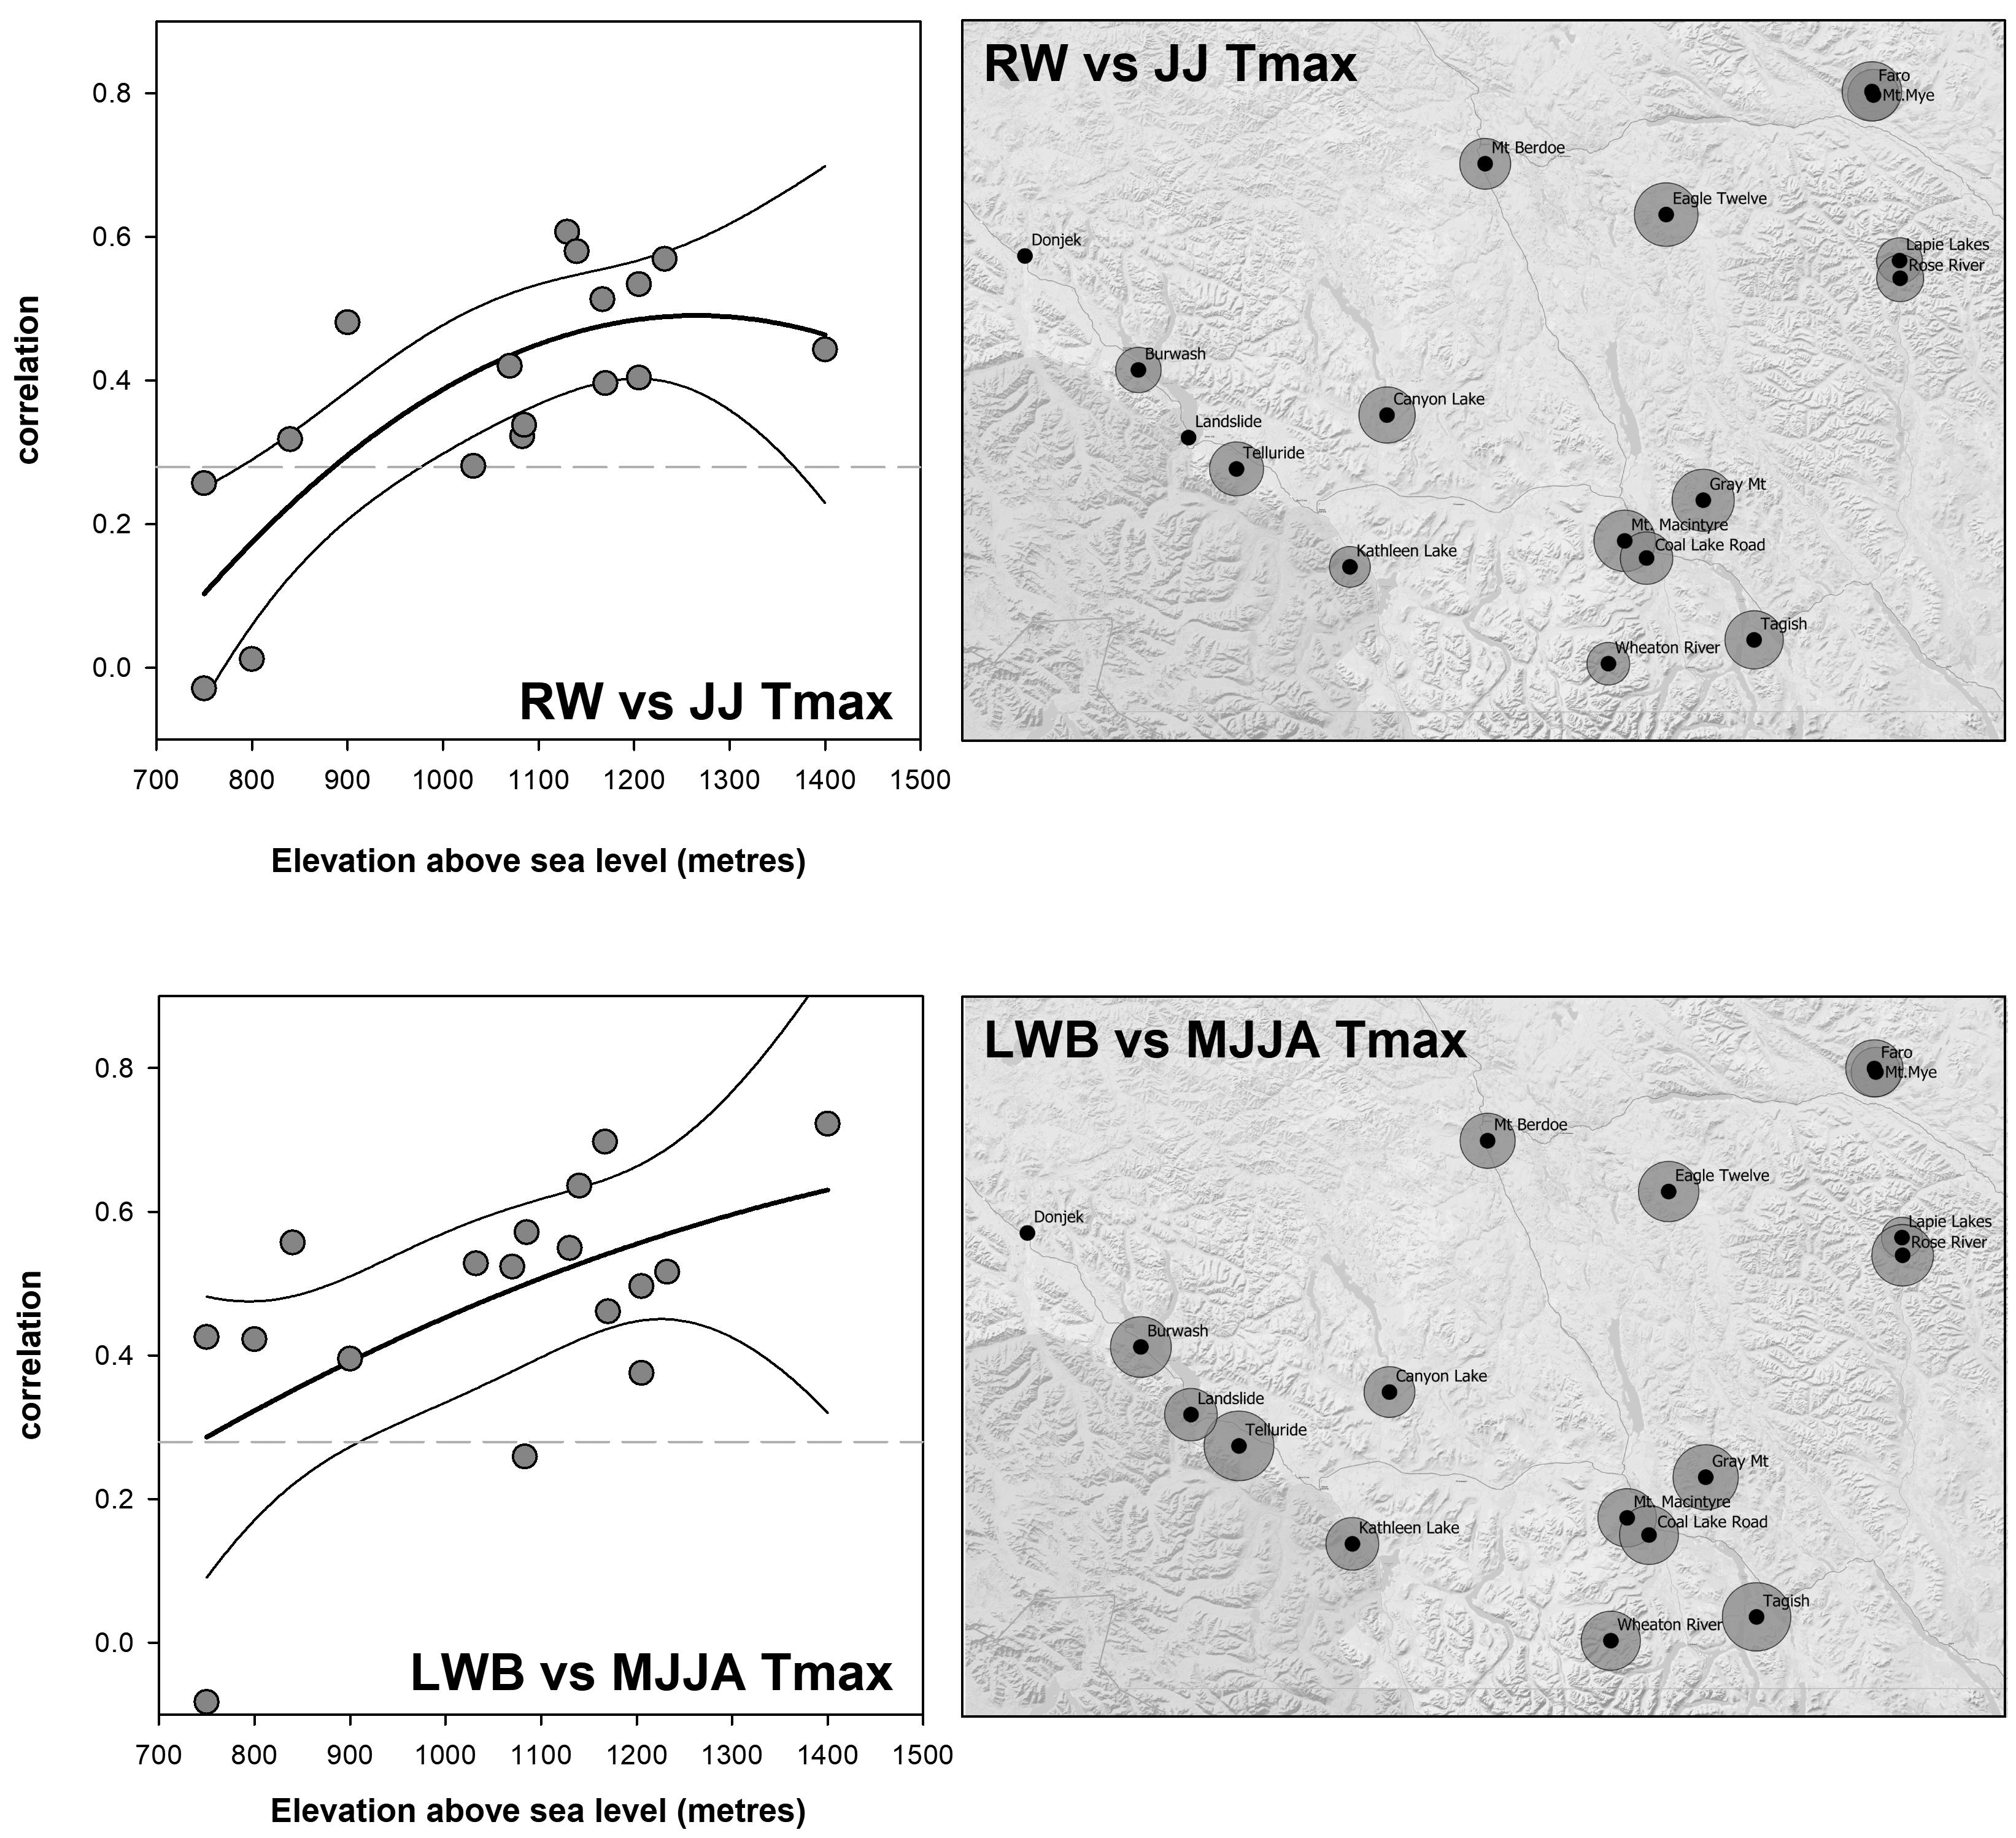


**Figure 5:** Individual site chronology (ADSne-sf) correlations against June-July (RW) and MJJA (LWB) maximum temperatures. **Left:** correlations plotted against site elevation. Dashed horizontal lines denote the 95% confidence limit. Non-linear relationship is shown using a 2nd-order polynomial function (with 2-sigma error); **right:** correlations plotted spatially. Circle size is proportional to the correlation value.


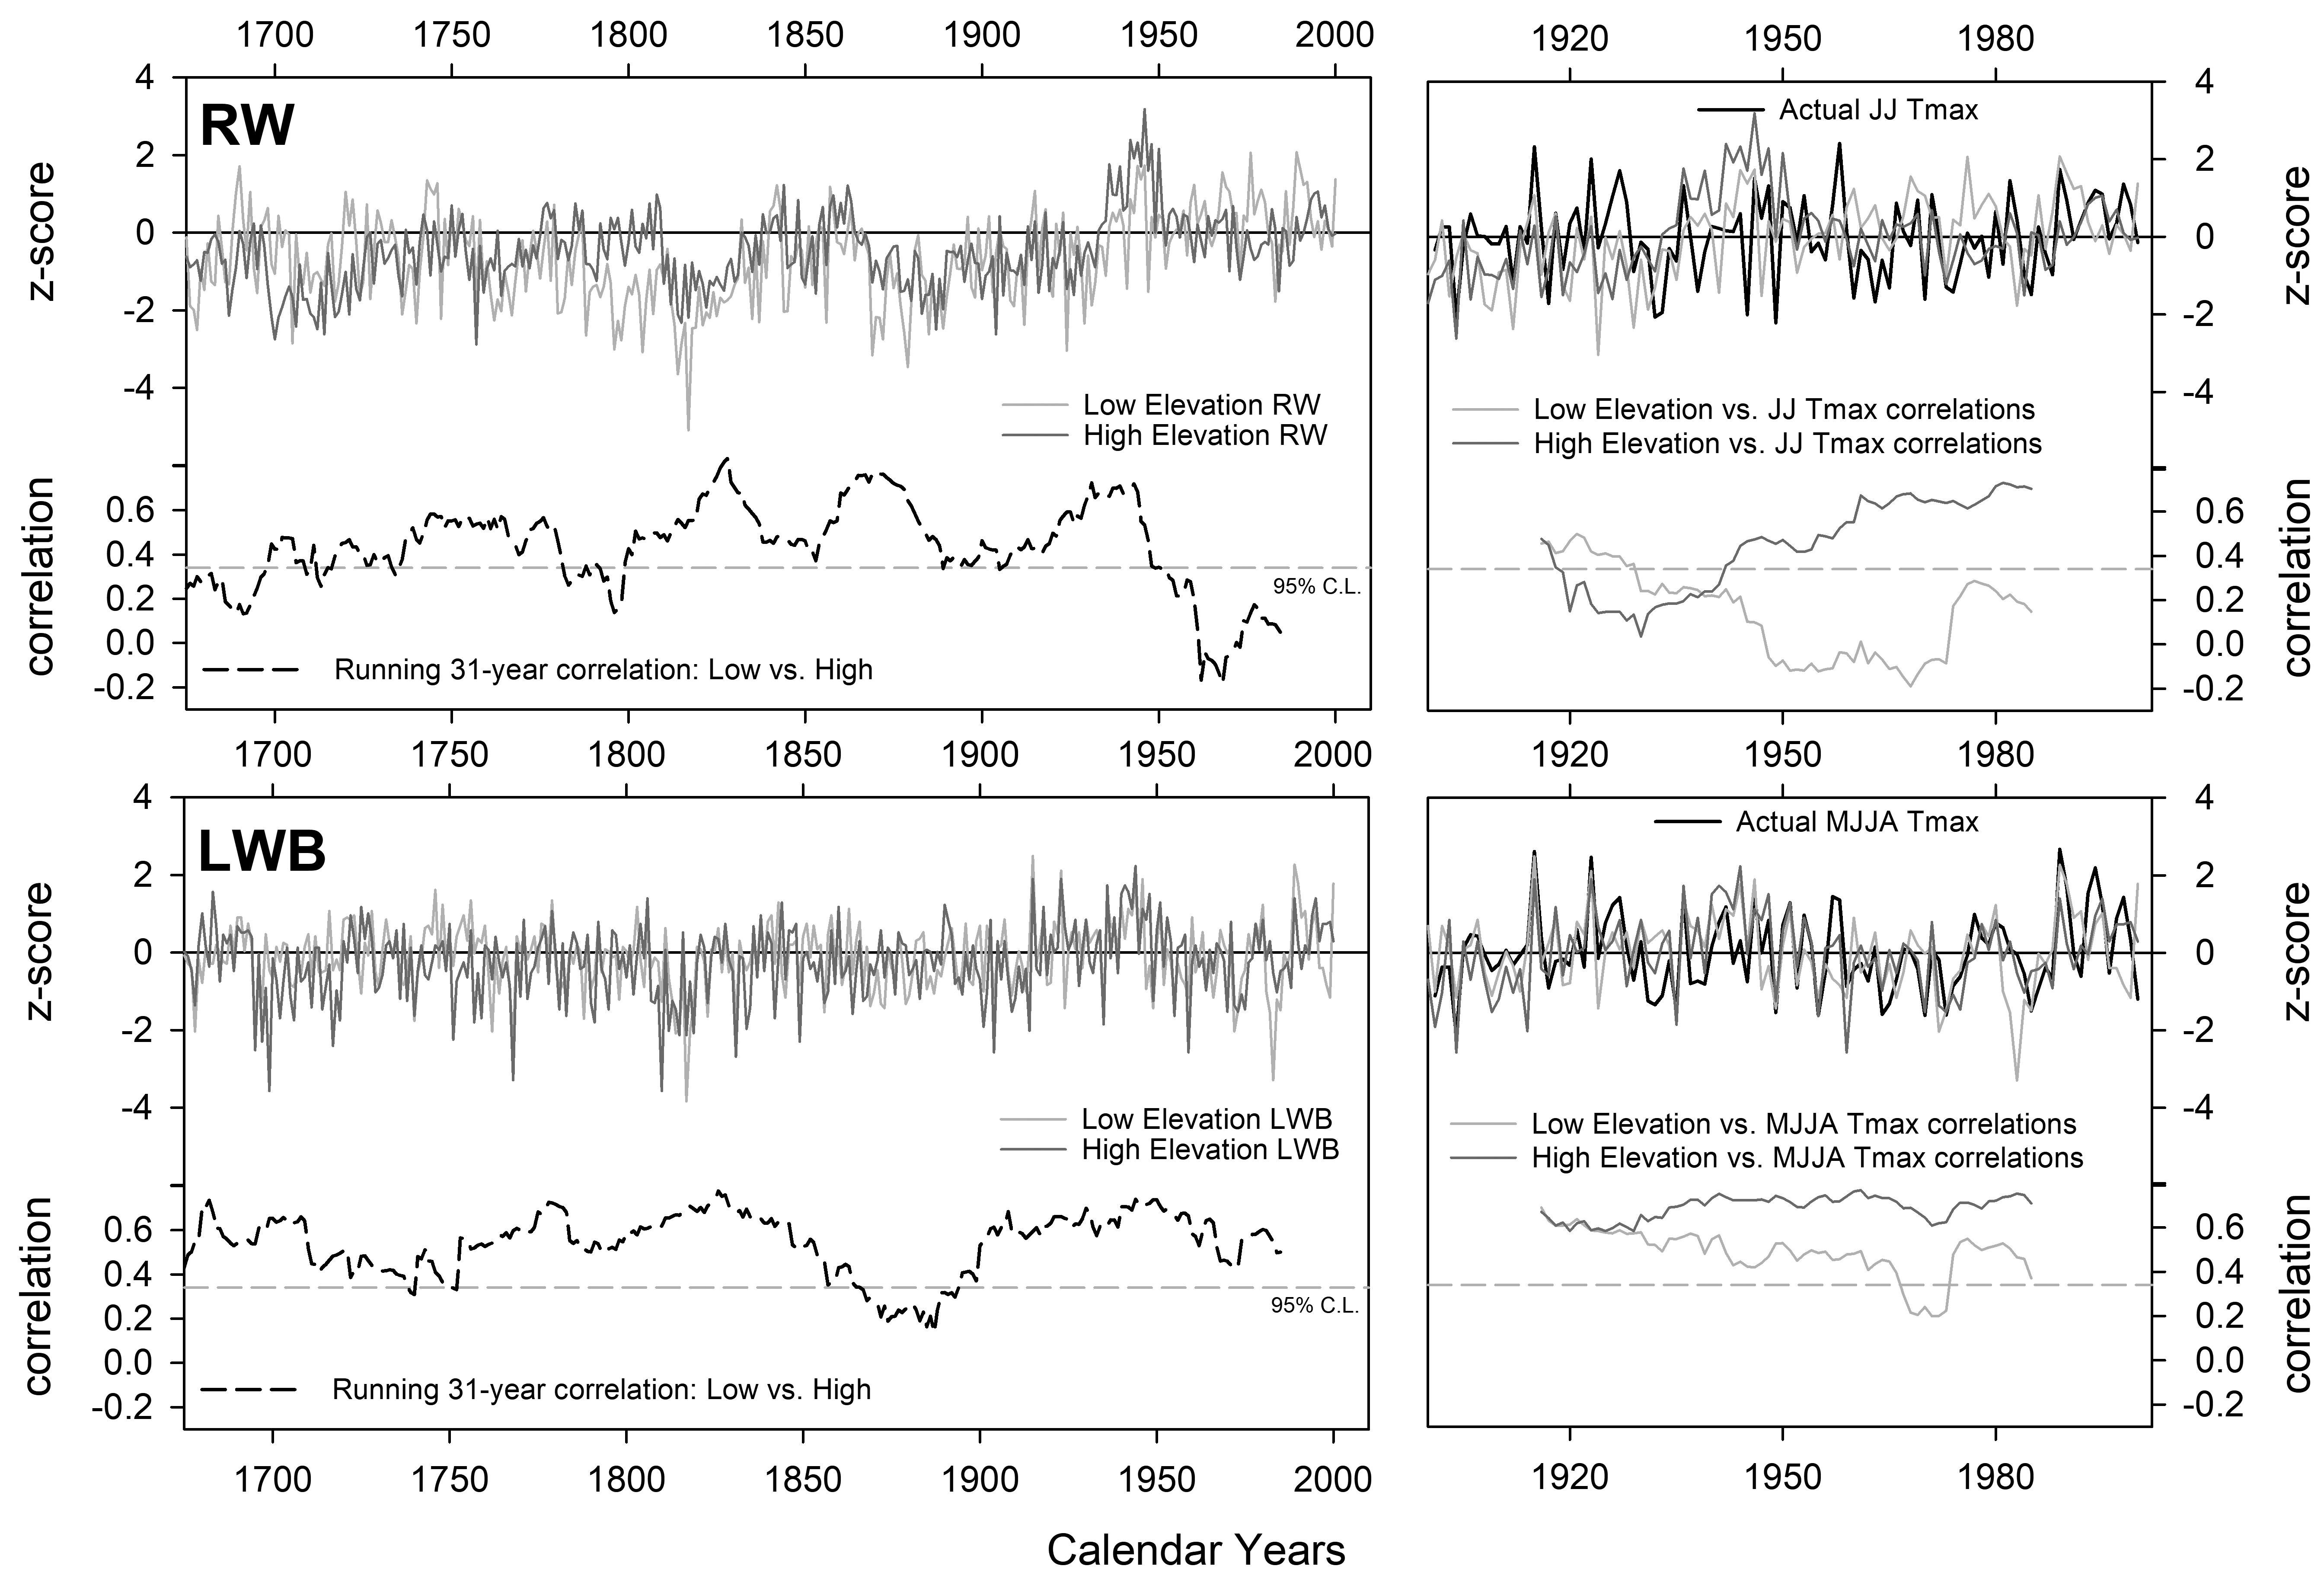


**Figure 6: Left:** Comparison of low (< 900 m asl) and high elevation regional composite chronologies (detrended using ADSne-sf) for RW and LWB. The chronology period shown is expressed by a minimum replication of 30 series. Horizontal dashed line denotes the 95% confidence limit for the running 31-year correlations between the records; **Right:** Low and high elevation chronologies compared to respective optimal temperature seasons (JJ Tmax for RW and MJJA Tmax for LWB) – including running 31-year correlations. Time-series have been transformed to z-scores relative to the 1901-2000 period.


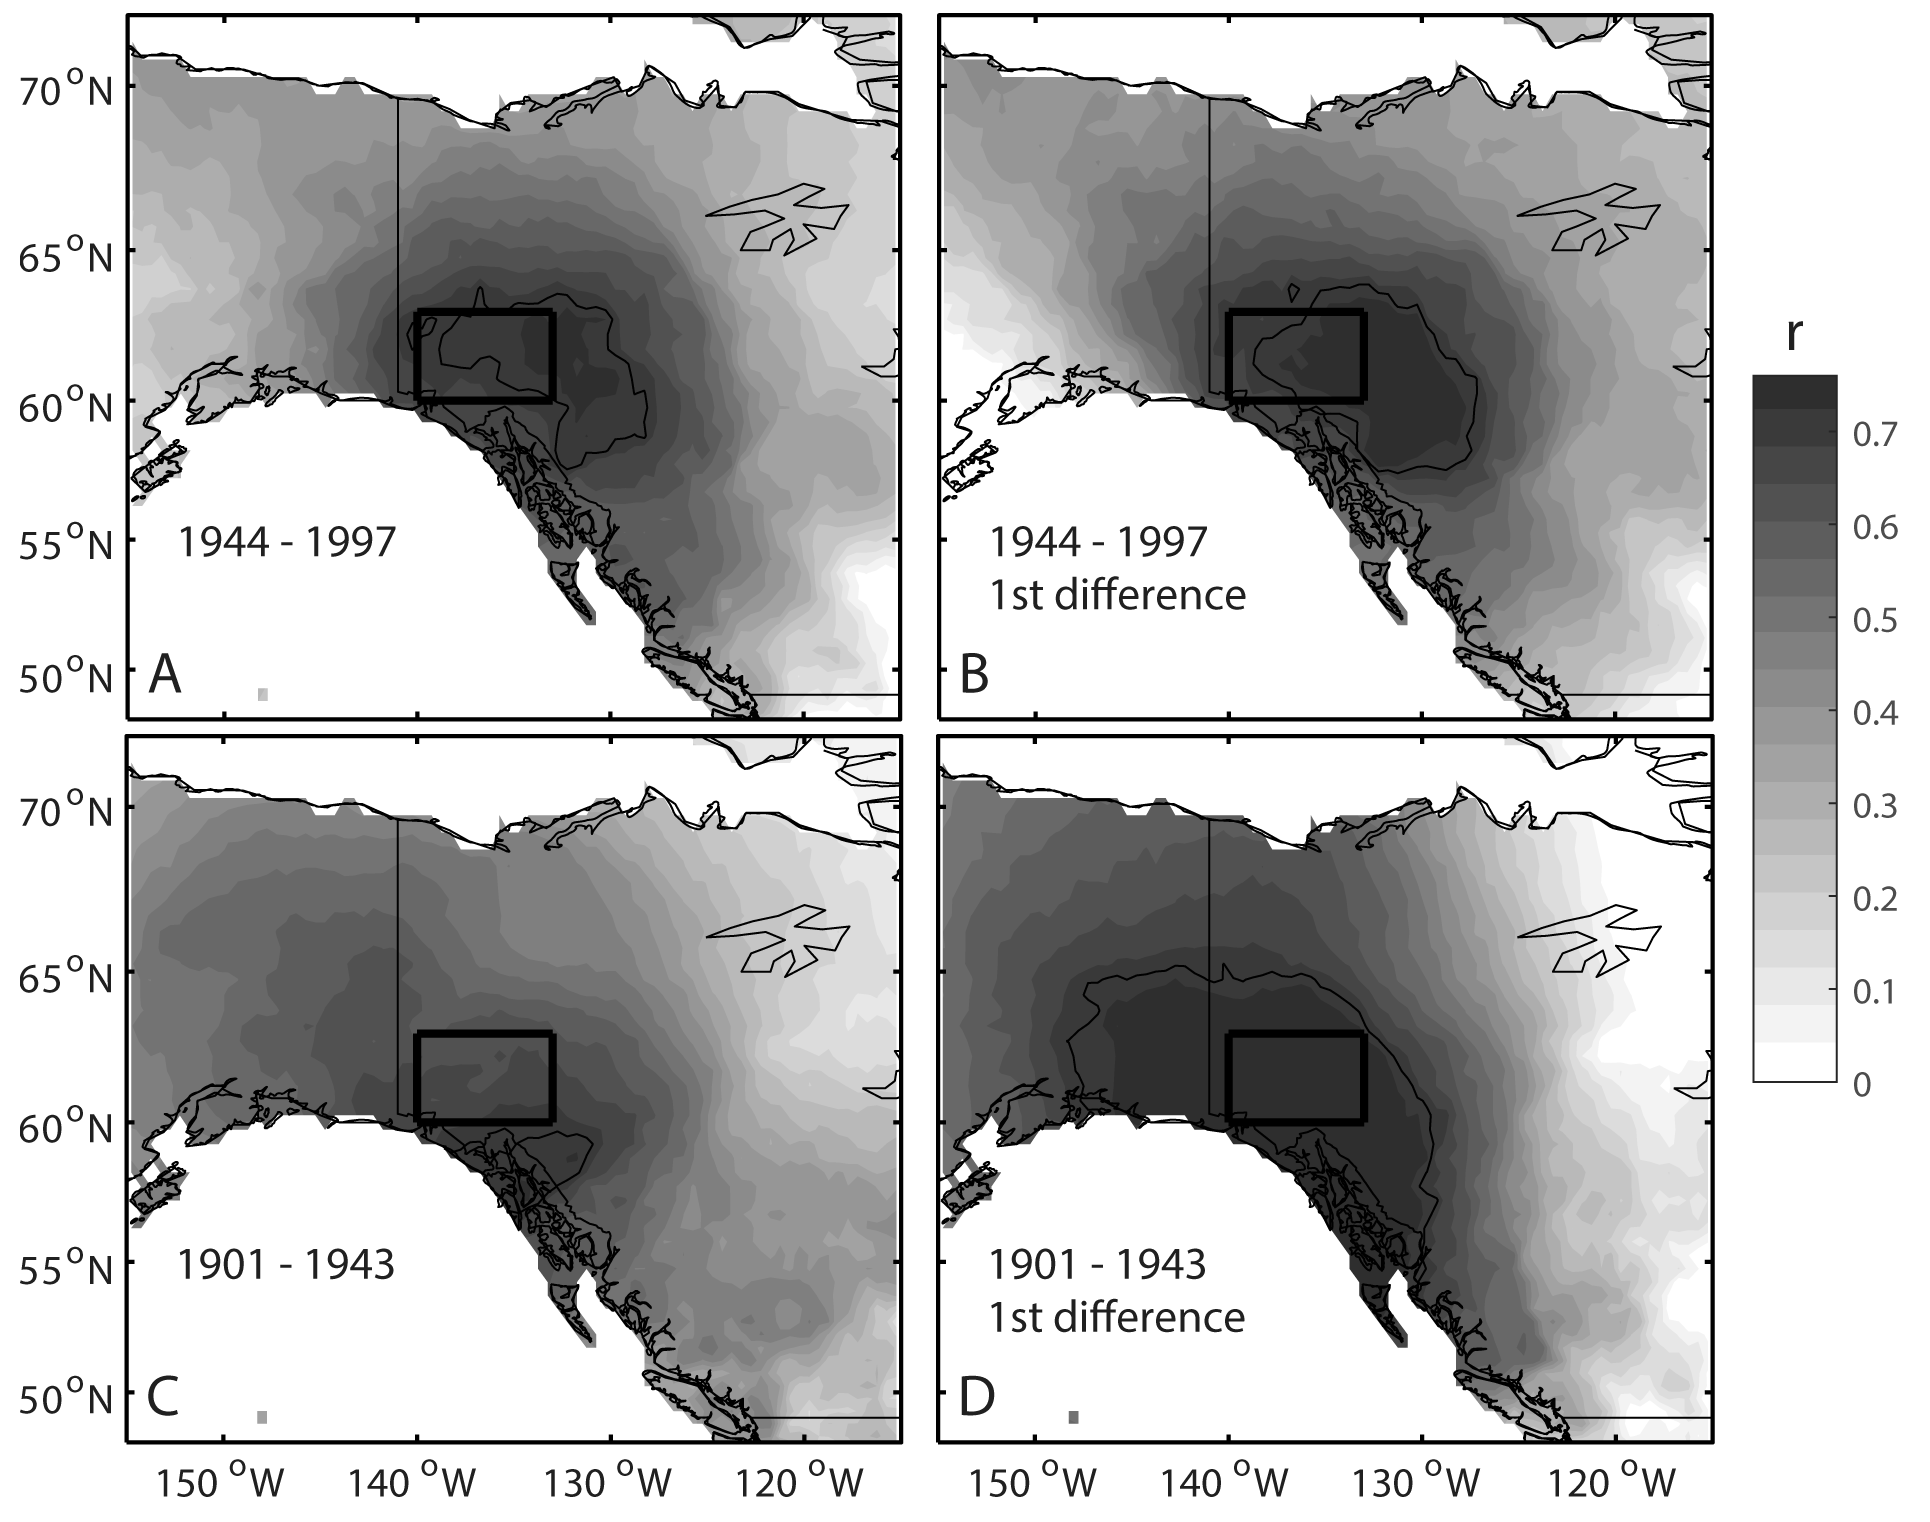


**Figure 7:** Spatial correlations of ADSne-sf reconstruction with MJJA Tmax for the period 1944-1997 (A and B are for non-transform and 1st differenced correlations) and 1901-1943 (C and D – as for A and B). Study region denoted by box while black contour denotes region where r2 is ≥ 0.50.


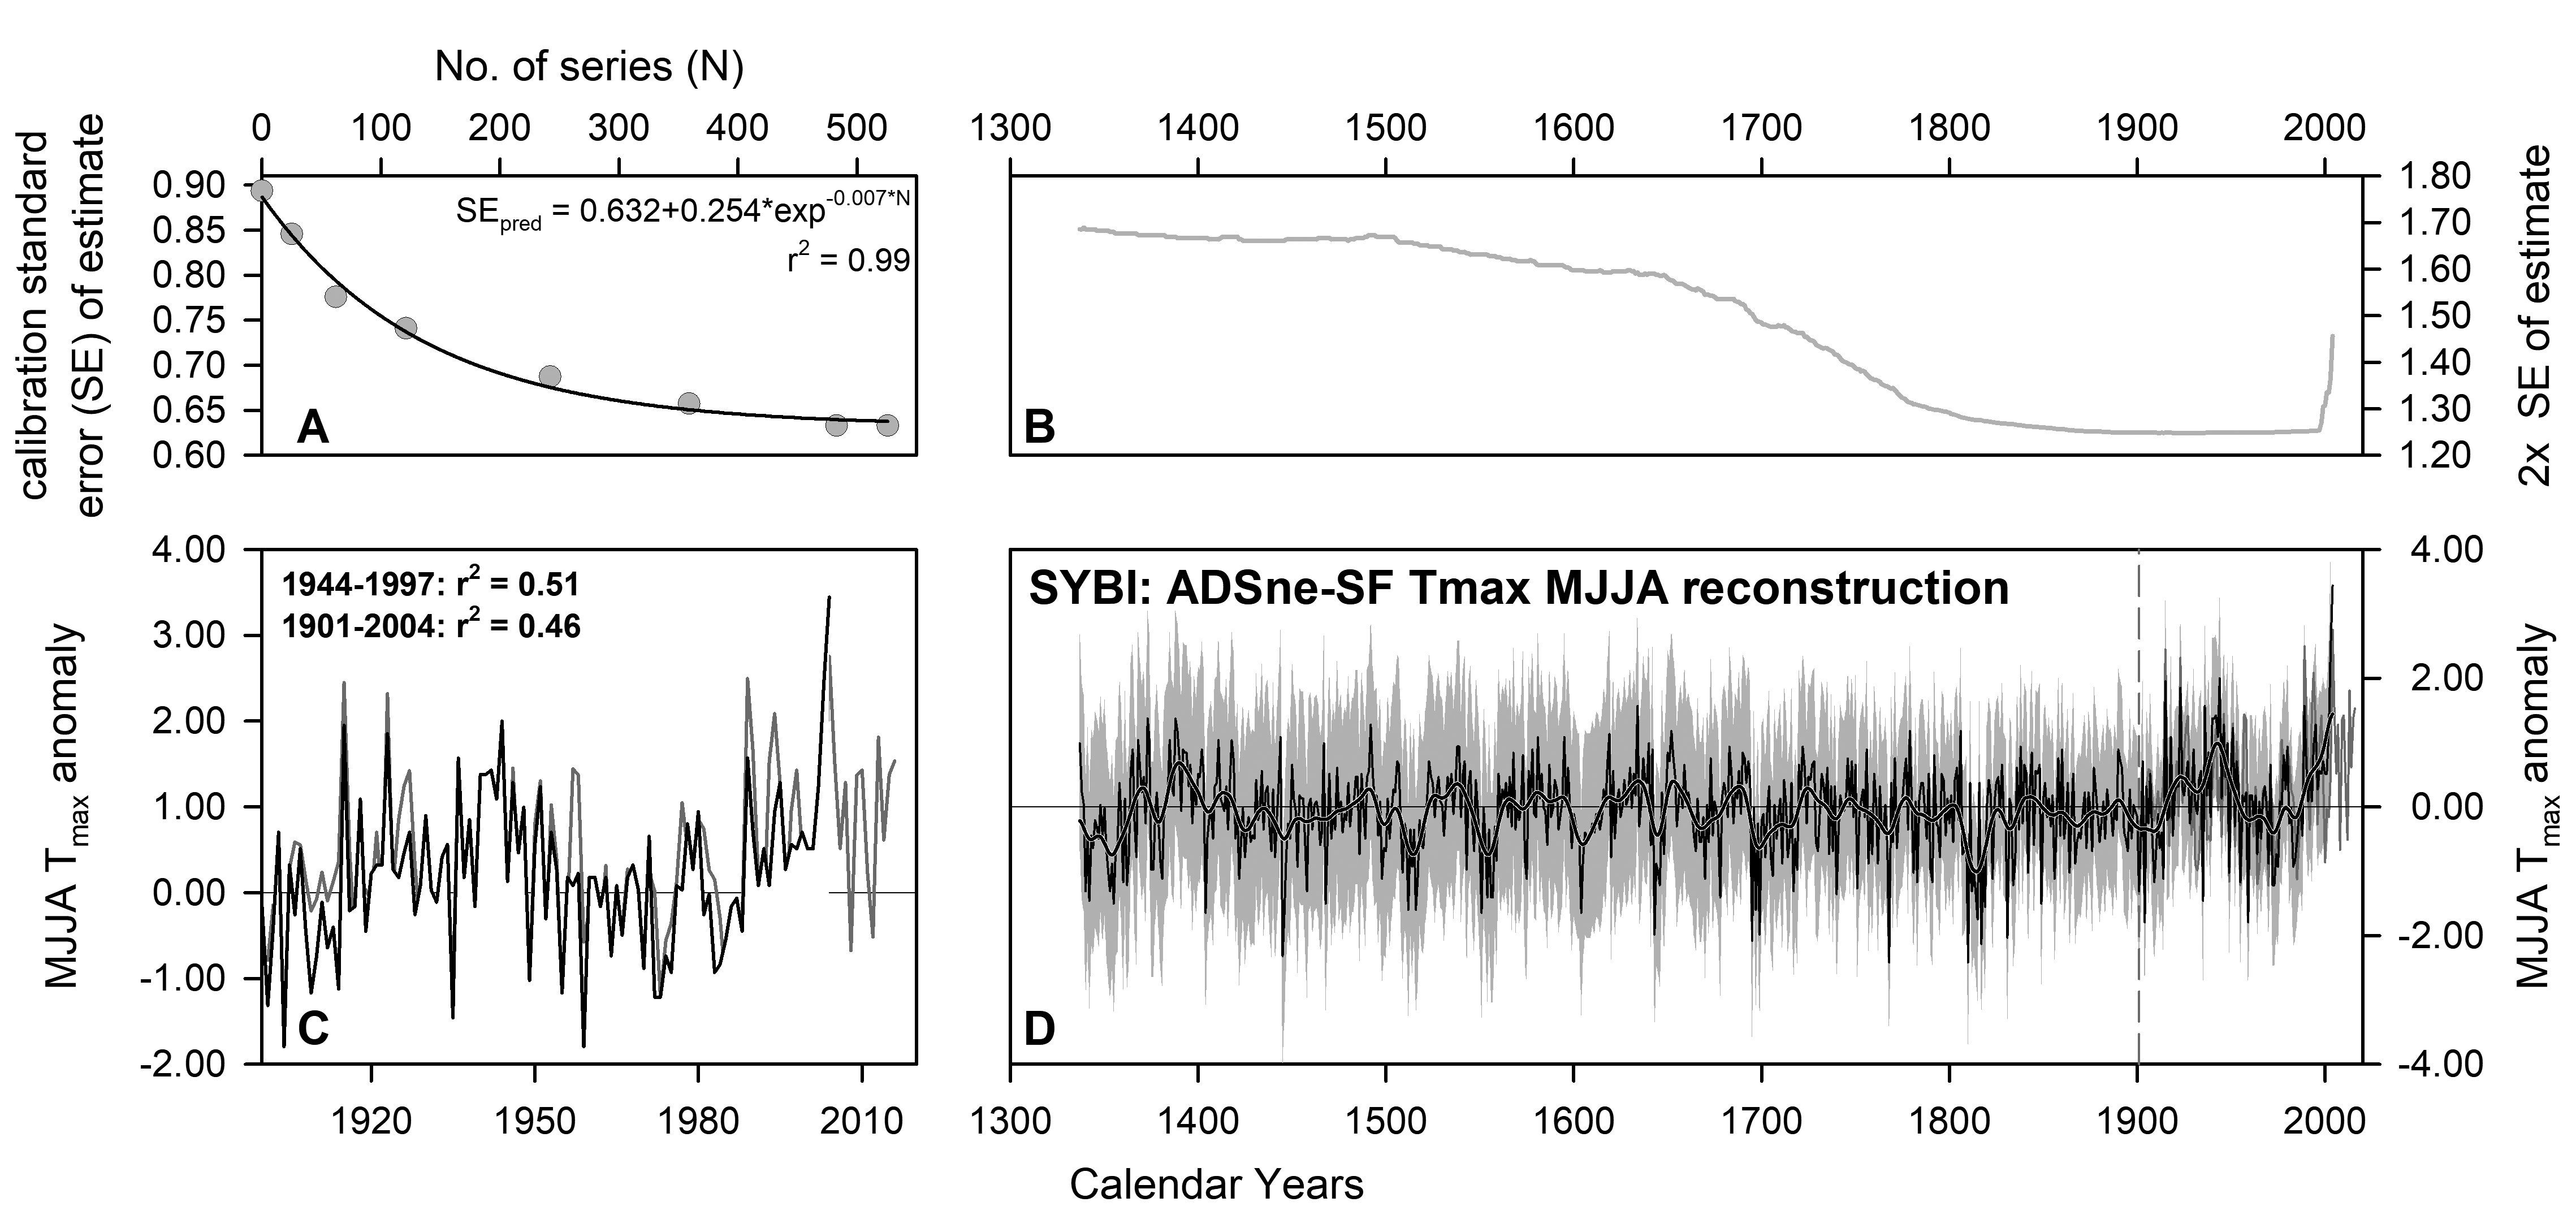


**Figure 8: A:** Sub-setnested modelling (Meko 1997) using the calibration period (1944-1997) to model the change in the standard error (SE) of regression estimate as replication decreases. Start dates (no. of TR series) of the nests were 1944 (526), 1850 (483), 1800 (242), 1750 (121), 1700 (62) and 1650 (25). The non-linear negative exponential function was used to model the relationship between SE and N; **B:** Modelled 2x standard error (SE) using the replication of the LWB data (Figure 3) and the relationship shown in **A**; **C:** Comparison of actual (red) and reconstructed (black) May-August maximum temperatures; **D:** Full southern Yukon (SYBI) reconstruction with 20-year Gaussian smoother (blue).


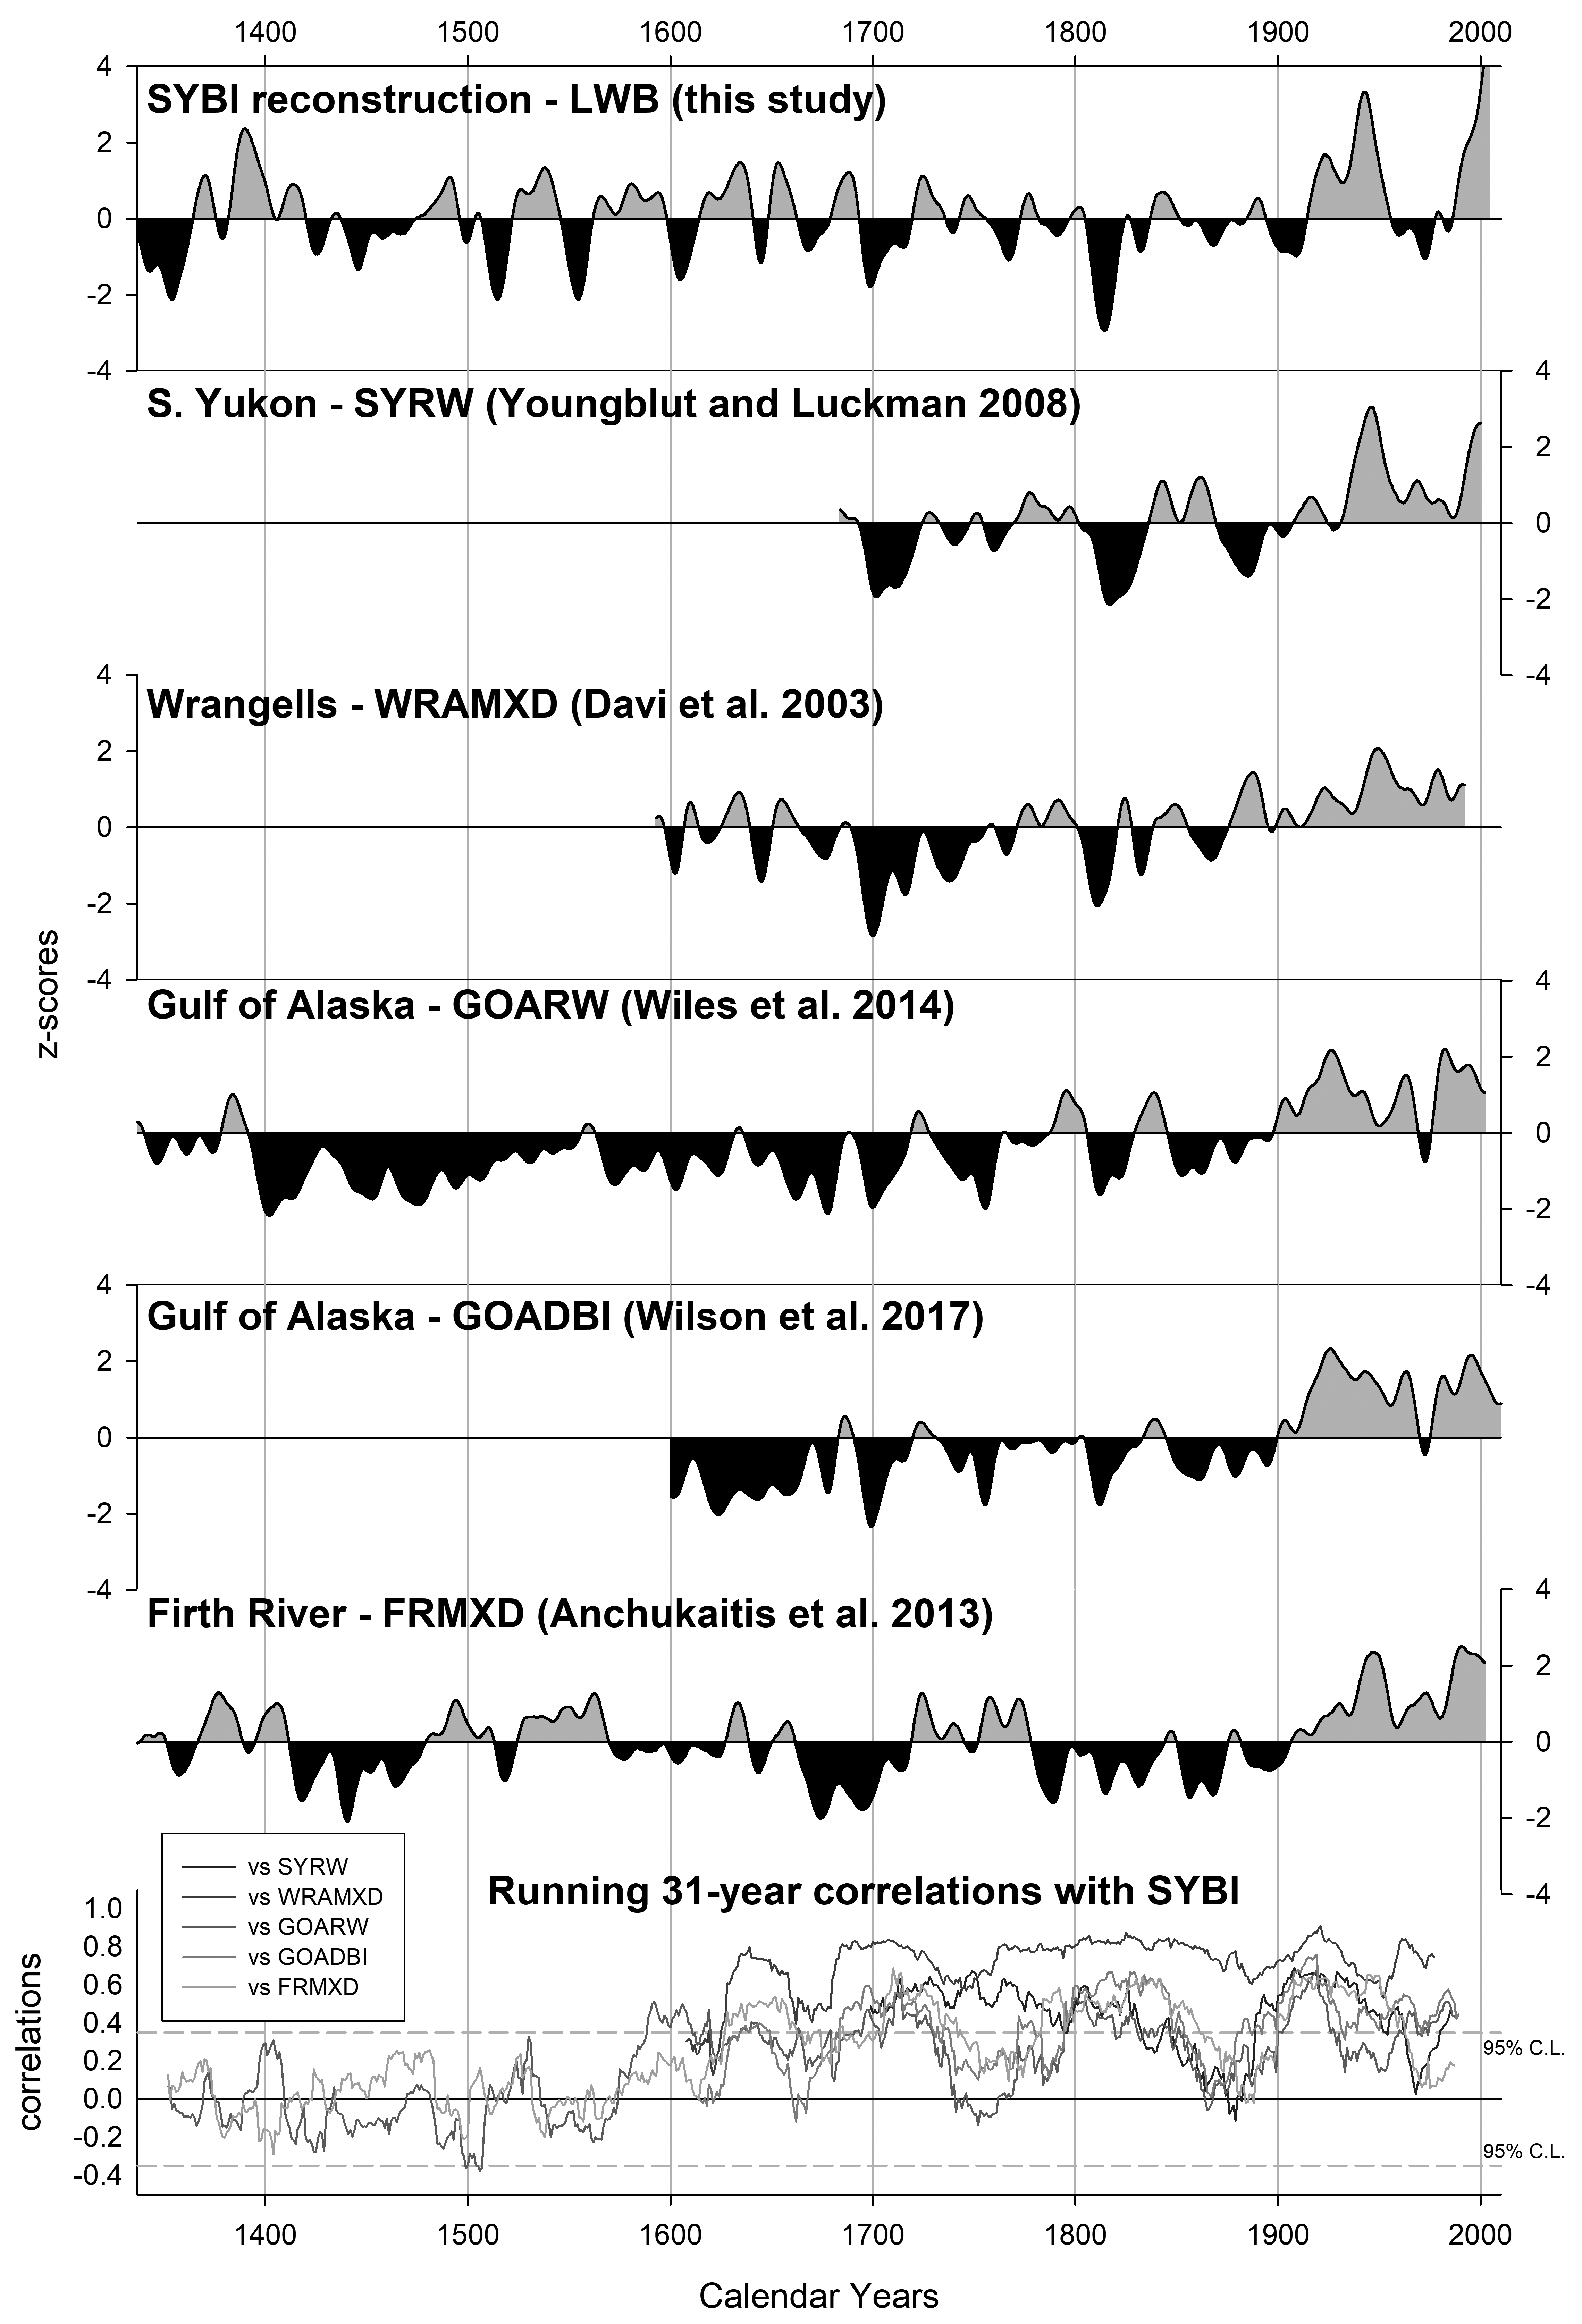


**Figure 9:** Low pass filter (20-year Gaussian) comparison between SYBI and other regional summer temperature reconstructions for north-west North America. All series transformed to z-scores relative to the common period. Lower panel shows running 31-year correlations between SYBI and the other regional reconstructions.

**Table 1:** Site meta-information - location, elevation and number of series measured per site/variable. * denotes site used in Youngblut and Luckman (2008).

**Table 2:** Detrending methods used for either RW or LWB data or both (RW / LWB).

**Table 3:** Station data (mean temperatures) within or proximal to the CRU TS 4.01 grid (60-63oN / 140-133oW) used. See Figure 1 for locations.

**Table 4:** RBAR and number of series needed to attain an EPS of 0.85. For RBAR values, RW and LWB data were detrended using the ADSne-sf version. Also shown is first year for each site when replication is ≥ 15 series.

**Table 5:** Calibration (1944-1997) and validation (1901-1943/1998-2004) results for RW and LWB against Tmean and Tmax. Full period calibration r2 values calculated over 1901-2004 period. Validation metrics highlighted in grey are non-significant.

**Table 6:** Top five warmest and coldest years and decades in the SYBI summer maximum temperature reconstruction.
